# Supplementary material for: Identification, characteristics, and dynamics of Arctic extreme seasons
Source: Copernicus journal article supplement (doi:10.5194/wcd-2021-18), 2021-04-13
Supplement: Supplementary file 1 [file wcd-2021-18-supplement.zip]

Archive with 4 entries (4 files):
- Supplement_Arctic_extreme_seasons.pdf
- supplementary_animation_S1_DJF_1112.gif
- supplementary_animation_S2_DJF_1617.gif
- supplementary_animation_S3_DJF_1213.gif
