# Supplementary material for: Identification, characteristics, and dynamics of Arctic extreme seasons
Source: Copernicus journal article supplement (doi:10.5194/wcd-2021-18), 2021-04-13
Supplement: Supplementary file 1 [file wcd-2021-18-supplement.zip › Supplement_Arctic_extreme_seasons.pdf]

## Information on the supplementary animations

The supplementary animations S1-S3 show daily synoptic plots for each of the discussed case studies and further illustrate the interplay of the synoptic systems and the occurrence of the anomalies in the considered surface parameters. S1 shows synoptic plots for DJF 2011/12, S2 shows synoptic plots for DJF 2016/17 and S3 shows synoptic plots for DJF 2012/13. The current date is stated in the figure title (format: YYYYMMDD\_HH).

Each plot shows: Daily anomaly of potential temperature at 900 hPa (TH; K, color). Instantaneous sea-level pressure (SLP, grey contour, in intervals of 10 hPa), sea ice edge (SIC = 0.5, solid yellow line), climatological sea ice edge (SIC<sub>clim</sub> = 0.5, dashed yellow line), cyclone mask (dashed black contour) and blocking mask (dashed green contour) at 00 UTC on the considered day. The affected sub-region(s) (S1: **KBI** and **KBM**, S2: **KBI**, **KBM** and **KBS**, S3: **ARI** and **KBI**) are marked by orange hatching.

Please note: In the animations, potential temperature is denoted as "TH" and not as " $\theta$ " (as it is in the manuscript).

## Data detrending

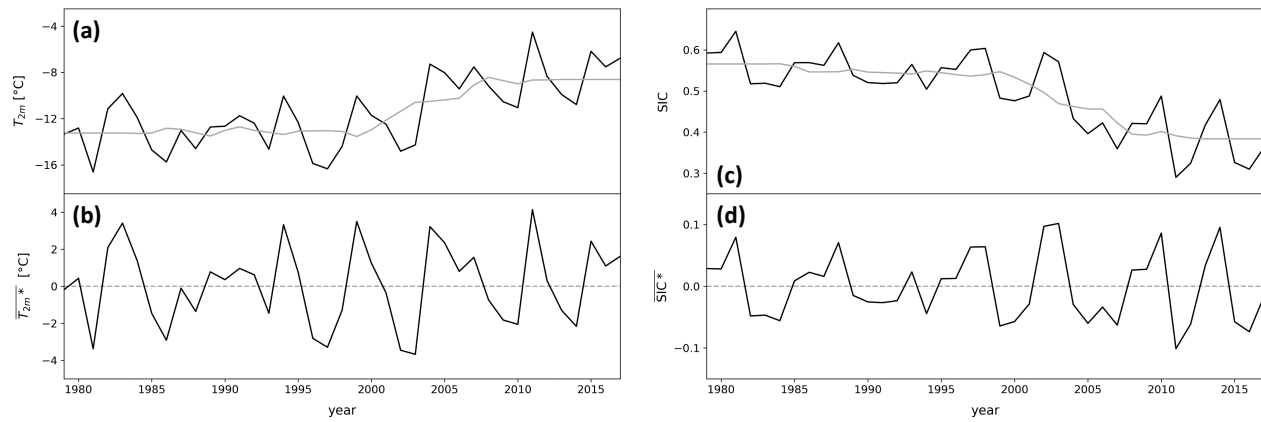

**Figure S1.** Upper panel: Seasonal mean values (black line) and transient climatology (grey line) of **(a)**  $T_{2m}$  (°C) and **(c)** SIC for DJF in the Kara-Barents Seas. Lower panel: Seasonal mean anomalies calculated as difference of seasonal mean values and transient climatology (black line) of **(b)**  $T_{2m}$  ( $T_{2m}^*$ , °C) and **(d)** SIC ( $SIC^*$ ).

## PCA results (MAM and SON)

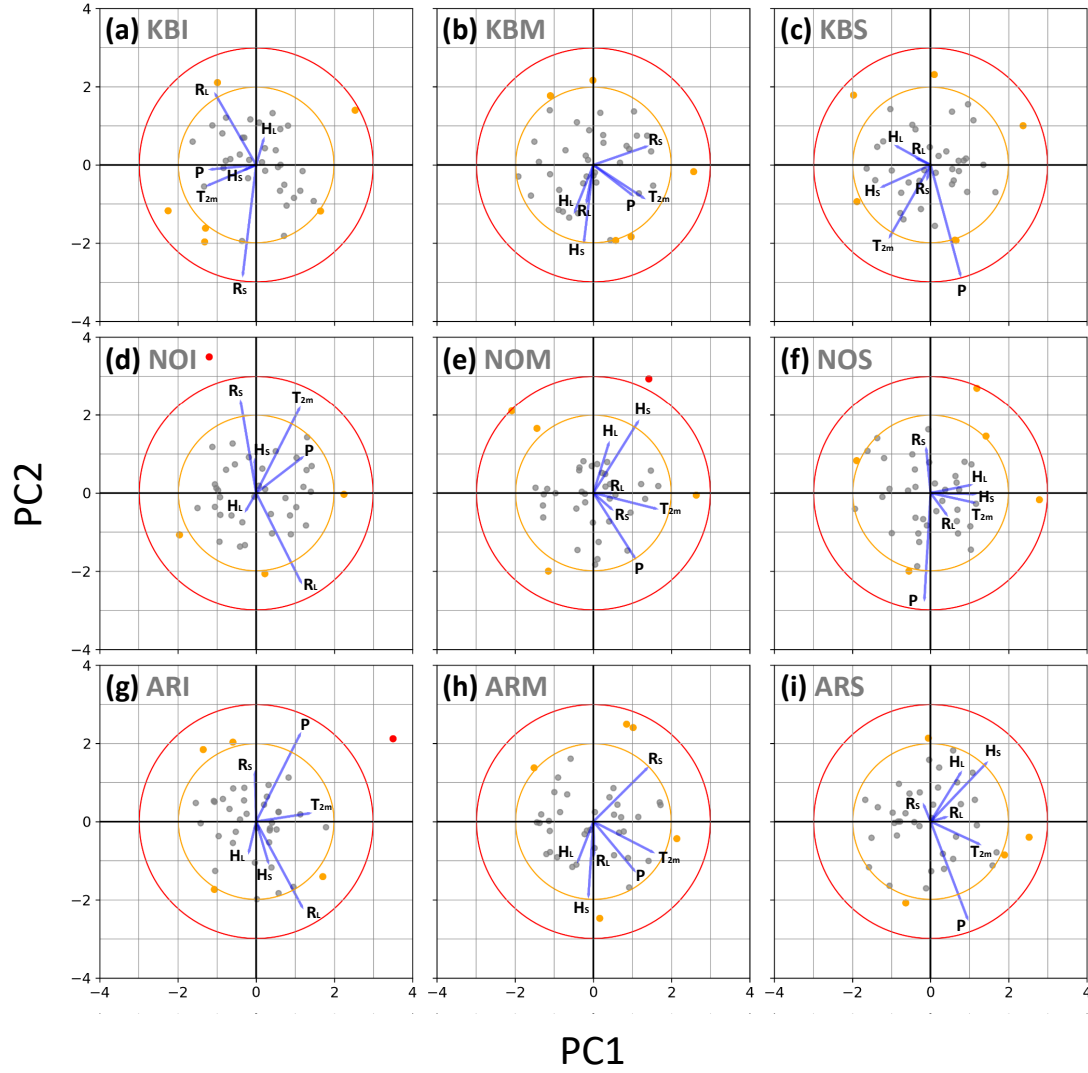

**Figure S2.** PCA biplot for all sub-regions in MAM with PC1 and PC2 along the x- and y-axis, respectively. Every season is represented by a grey dot, red and orange dots show extreme and anomalous seasons, respectively. Blue lines represent the coefficients of the precursor variables. Red and orange circles represent  $d_M=3$  and  $d_M=2$ , respectively.

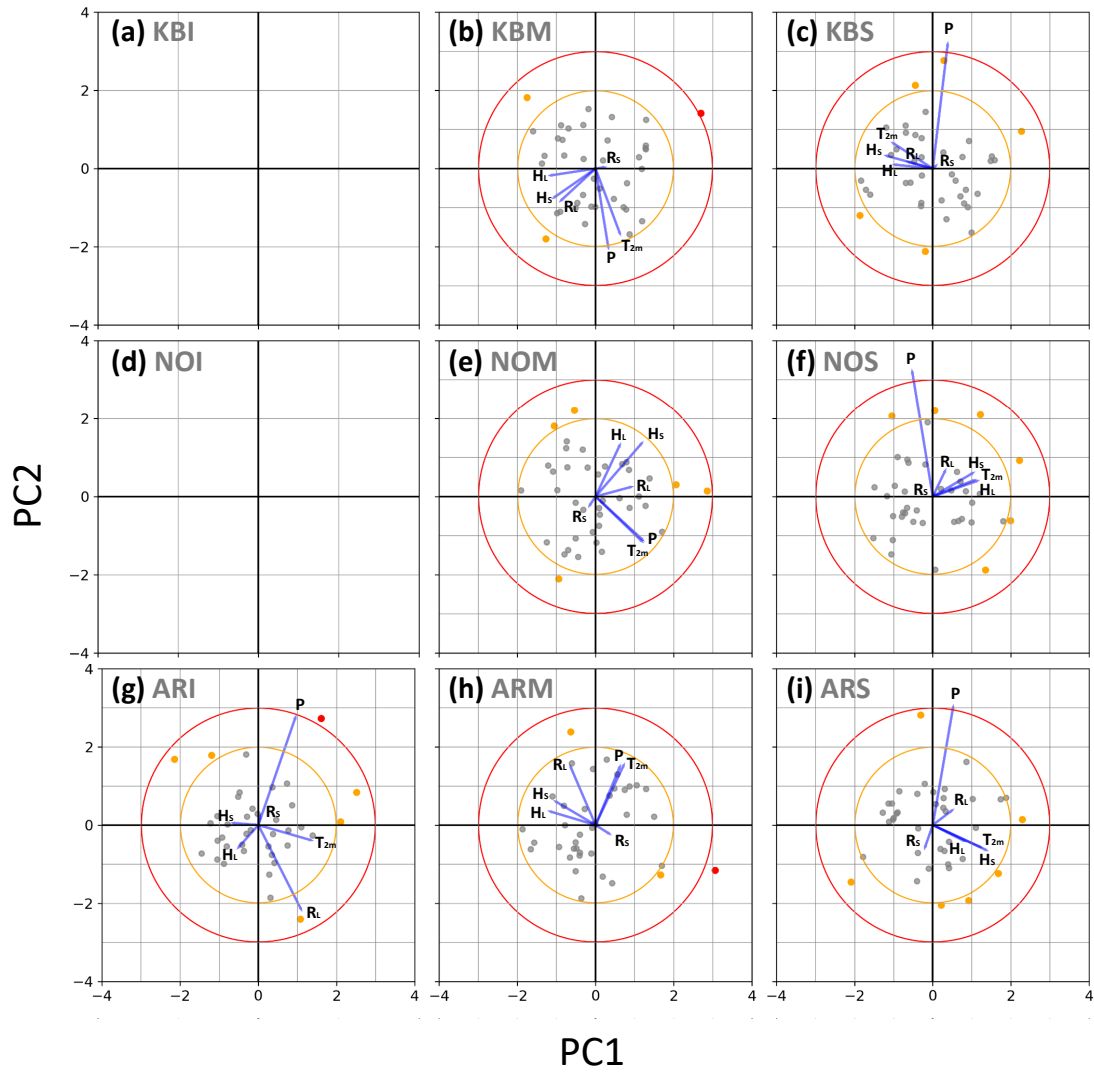

**Figure S3.** As Fig. S2 but for SON. No biplots are shown for the sub-regions **KBI** and **NOI**, because they fall below the minimum size threshold of  $10^5 \text{ km}^2$  in autumn.

# Arctic anomalous seasons

20

| Season   | Sub-regions | $d_M$ | $\overline{T_{2m}^*}$ [K] | $\overline{P^*}$ [mm day <sup>-1</sup> ] | $\overline{E_S^*}$ [W m <sup>-2</sup> ] | Area [10 <sup>5</sup> km <sup>2</sup> ] |
|----------|-------------|-------|---------------------------|------------------------------------------|-----------------------------------------|-----------------------------------------|
| 1981/82  | ARM         | 2.1   | +1.25 (+0.96)             | +0.09 (+0.60)                            | +10.63 (+1.26)                          | 21.1                                    |
|          | ARS         | 2.1   | +1.14 (+0.64)             | -0.69 (-1.45)                            | +34.06 (+1.45)                          |                                         |
| 1982/83  | KBS         | 2.6   | +2.10 (+1.66)             | +0.66 (+2.05)                            | +16.19 (+0.68)                          | 8.3                                     |
|          | NOI         | 2.9   | +0.05 (+0.03)             | +0.46 (+1.01)                            | -16.61 (-2.95)                          |                                         |
| 1983/84  | ARM         | 2.1   | -2.44 (-1.88)             | -0.25 (-1.64)                            | +11.26 (+1.34)                          | 21.1                                    |
|          | ARS         | 2.3   | -4.42 (-2.48)             | -0.54 (-1.14)                            | -31.91 (-1.36)                          |                                         |
| 1984/85  | NOM         | 2.3   | +4.34 (+2.73)             | +0.42 (+1.02)                            | +11.23 (+0.43)                          | 34.0                                    |
|          | NOS         | 2.1   | +1.17 (+2.45)             | -0.60 (-1.32)                            | +29.50 (+1.64)                          |                                         |
| 1985/86  | NOI         | 2.3   | -2.19 (-1.06)             | -0.78 (-1.69)                            | +8.01 (+1.42)                           | 50.4                                    |
|          | NOS         | 2.1   | -0.37 (-0.77)             | -0.68 (-1.50)                            | -4.69 (-0.26)                           |                                         |
|          | ARM         | 2.5   | +3.28 (+2.52)             | +0.32 (+2.06)                            | -10.32 (-1.23)                          |                                         |
|          | ARS         | 2.8   | +3.69 (+2.07)             | +0.71 (+1.49)                            | +63.00 (+2.68)                          |                                         |
|          |             |       |                           |                                          |                                         |                                         |
| 1986/87  | KBS         | 2.0   | -1.97 (-1.56)             | -0.09 (-0.29)                            | -54.00 (-2.28)                          | 6.7                                     |
| 1988/89  | NOI         | 2.3   | -4.39 (-2.12)             | -0.40 (-0.88)                            | -8.72 (-1.55)                           | 1.5                                     |
| 1992/93  | KBS         | 2.0   | +0.83 (+0.66)             | +0.63 (+1.96)                            | +4.85 (+0.21)                           | 12.9                                    |
|          | NOM         | 2.1   | -0.75 (-0.47)             | +0.28 (+0.67)                            | -58.47 (-2.22)                          |                                         |
| 1993/94  | ARI         | 2.4   | -0.60 (-1.02)             | -0.09 (-1.85)                            | +1.50 (+0.42)                           | 82.3                                    |
| 1995/96  | NOS         | 2.3   | +0.12 (+0.24)             | -0.93 (-2.05)                            | +28.35 (+1.58)                          | 27.8                                    |
| 1996/97  | KBS         | 2.3   | -1.88 (-1.50)             | +0.50 (+1.54)                            | -56.87 (-2.40)                          | 13.0                                    |
|          | NOM         | 2.3   | -2.23 (-1.40)             | -0.64 (-1.55)                            | +39.35 (+1.49)                          |                                         |
| 2000/01  | NOS         | 2.2   | +0.11 (+0.23)             | -0.99 (-2.18)                            | +7.99 (+0.45)                           | 27.8                                    |
| 2005/06  | NOS         | 2.1   | +0.81 (+1.69)             | -0.12 (-0.27)                            | +36.78 (+2.05)                          | 27.8                                    |
| 2011/12  | KBI         | 2.5   | +6.65 (+2.64)             | +0.26 (+2.01)                            | +5.94 (+0.62)                           | 16.0                                    |
|          | KBM         | 2.7   | +4.72 (+1.74)             | -0.01 (-0.06)                            | +28.41 (+1.59)                          |                                         |
| 2012/13* | ARI         | 2.8   | -1.27 (-2.15)             | -0.11 (-2.41)                            | -5.58 (-1.55)                           | 82.3                                    |
| 2013/14  | KBI         | 2.8   | -3.80 (-1.51)             | -0.32 (-2.45)                            | +17.02 (+1.77)                          | 5.4                                     |
| 2014/15  | NOS         | 2.3   | -0.67 (-1.40)             | +0.86 (+1.89)                            | -42.95 (-2.39)                          | 27.8                                    |
| 2015/16  | ARI         | 2.1   | -0.18 (-0.31)             | -0.02 (-0.43)                            | +6.59 (+1.83)                           | 82.3                                    |
| 2017/18  | NOI         | 2.1   | +2.12 (+1.02)             | +0.64 (+1.40)                            | +10.47 (+1.86)                          | 83.8                                    |
|          | ARI         | 2.0   | +1.34 (+2.27)             | +0.01 (+0.29)                            | +6.24 (+1.74)                           |                                         |

**Table S1.** Anomalous seasons for DJF, including the affected sub-regions and respective Mahalanobis distance  $d_M$ , the seasonal mean anomalies of  $T_{2m}$ ,  $P$  and  $E_S$  (standardized seasonal mean anomalies in brackets) and total affected area. Seasons labeled with an asterisk occur as extreme seasons in one or several other sub-region(s) (see Table 2 in the main paper).

| Season       | Sub-regions | $d_M$ | $\overline{T_{2m}^*}$ [K] | $\overline{P^*}$ [mm day <sup>-1</sup> ] | $\overline{E_S^*}$ [W m <sup>-2</sup> ] | Area [10 <sup>5</sup> km <sup>2</sup> ] |
|--------------|-------------|-------|---------------------------|------------------------------------------|-----------------------------------------|-----------------------------------------|
| <b>1980</b>  | KBS         | 2.2   | -0.36 (-0.61)             | -0.60 (-2.26)                            | -3.39 (-0.63)                           | 25.5                                    |
|              | ARI         | 2.1   | -0.24 (-1.33)             | +0.13 (+0.69)                            | -1.49 (-0.44)                           |                                         |
| <b>1981</b>  | KBS         | 2.2   | -0.24 (-0.41)             | +0.40 (+1.50)                            | +2.03 (+0.37)                           | 11.2                                    |
| <b>1983</b>  | NOS         | 2.2   | -0.43 (-1.15)             | +0.59 (+2.67)                            | -6.96 (-1.87)                           | 30.4                                    |
| <b>1985</b>  | KBS         | 2.1   | +0.02 (+0.03)             | -0.50 (-1.91)                            | +6.97 (+1.29)                           | 11.2                                    |
| <b>1987</b>  | NOM         | 2.2   | -0.16 (-0.50)             | -0.75 (-2.27)                            | +4.00 (+0.71)                           | 35.5                                    |
|              | NOS         | 2.2   | -0.10 (-0.27)             | -0.49 (-2.24)                            | -3.95 (-1.06)                           |                                         |
| <b>1989</b>  | ARI         | 2.5   | +0.26 (+1.42)             | +0.44 (+2.40)                            | -0.63 (-0.19)                           | 14.3                                    |
| <b>1991</b>  | ARS         | 2.1   | +0.54 (+1.42)             | -0.37 (-1.45)                            | +6.92 (+2.01)                           | 13.5                                    |
| <b>1992</b>  | ARS         | 2.4   | -0.56 (-1.47)             | -0.40 (-1.57)                            | -1.92 (-0.56)                           | 13.5                                    |
| <b>1993</b>  | KBM         | 2.0   | -0.11 (-0.26)             | -0.40 (-2.05)                            | +4.59 (+0.80)                           | 11.6                                    |
| <b>1994</b>  | ARI         | 2.2   | +0.08 (+0.45)             | +0.37 (+2.00)                            | +1.25 (+0.37)                           | 14.3                                    |
| <b>1995</b>  | KBM         | 2.4   | +0.91 (+2.20)             | +0.22 (+1.10)                            | +16.82 (+2.92)                          | 22.8                                    |
|              | KBS         | 2.1   | +0.31 (+0.52)             | +0.58 (+2.22)                            | -1.97 (-0.36)                           |                                         |
| <b>1996</b>  | ARI         | 2.1   | -0.13 (-0.71)             | +0.15 (+0.82)                            | -4.75 (-1.40)                           | 89.9                                    |
|              | ARM         | 2.0   | -0.18 (-1.10)             | +0.05 (+0.64)                            | -7.35 (-2.03)                           |                                         |
| <b>1998</b>  | ARM         | 2.4   | +0.45 (+2.71)             | +0.01 (+0.13)                            | +8.85 (+2.44)                           | 75.6                                    |
| <b>1999</b>  | KBM         | 2.3   | -0.51 (-1.23)             | +0.24 (+1.22)                            | -9.08 (-1.58)                           | 25.1                                    |
|              | ARS         | 2.4   | -0.68 (-1.81)             | +0.46 (+1.81)                            | -0.74 (-0.22)                           |                                         |
| <b>2000</b>  | NOM         | 2.7   | -0.65 (-2.01)             | -0.56 (-1.69)                            | -5.63 (-1.00)                           | 35.5                                    |
|              | NOS         | 2.2   | -0.67 (-1.78)             | -0.37 (-1.69)                            | -1.12 (-0.30)                           |                                         |
| <b>2002</b>  | ARS         | 2.5   | -0.13 (-0.34)             | -0.47 (-0.86)                            | +5.04 (+1.47)                           | 13.5                                    |
| <b>2003</b>  | NOS         | 2.4   | +0.98 (+2.61)             | -0.16 (-0.72)                            | +3.60 (+0.96)                           | 30.4                                    |
| <b>2004</b>  | ARM         | 2.7   | -0.01 (-0.04)             | -0.06 (-0.76)                            | -2.57 (-0.71)                           | 86.8                                    |
|              | KBS         | 2.1   | +0.52 (+0.89)             | -0.23 (-0.89)                            | +12.26 (+2.26)                          |                                         |
| <b>2005</b>  | ARM         | 2.1   | +0.13 (+0.77)             | -0.06 (-0.71)                            | +0.90 (+2.47)                           | 75.6                                    |
| <b>2006</b>  | KBM         | 2.1   | +0.43 (+1.04)             | +0.40 (+2.03)                            | +3.04 (+0.53)                           | 11.6                                    |
| <b>2007</b>  | ARM         | 2.2   | +0.34 (+2.05)             | -0.06 (-0.73)                            | +9.47 (+2.61)                           | 75.6                                    |
| <b>2008</b>  | ARS         | 2.4   | -0.37 (-0.97)             | -0.41 (-1.60)                            | +1.35 (+0.39)                           | 13.5                                    |
| <b>2011</b>  | ARS         | 2.2   | -0.41 (-1.08)             | +0.63 (+2.49)                            | -0.57 (-1.04)                           | 13.5                                    |
| <b>2013*</b> | KBS         | 2.8   | +1.64 (+2.79)             | -0.05 (-0.18)                            | +15.45 (+2.85)                          | 11.2                                    |
| <b>2016*</b> | KBS         | 2.4   | +1.69 (+2.88)             | +0.16 (+0.61)                            | -1.03 (-0.19)                           | 100.3                                   |
|              | ARM         | 2.1   | +0.13 (+0.78)             | +0.14 (+1.74)                            | +3.36 (+0.93)                           |                                         |
|              | ARS         | 2.2   | +0.88 (+2.34)             | -0.34 (-1.32)                            | +2.57 (+0.75)                           |                                         |
| <b>2018</b>  | NOS         | 2.1   | +0.04 (+0.10)             | +0.51 (+2.35)                            | -0.44 (-0.12)                           | 30.4                                    |

**Table S2.** Same as Table S1, but for JJA.

| Season       | Sub-regions | $d_M$ | $\overline{T_{2m}^*}$ [K] | $\overline{P^*}$ [mm day <sup>-1</sup> ] | $\overline{E_S^*}$ [W m <sup>-2</sup> ] | Area [10 <sup>5</sup> km <sup>2</sup> ] |
|--------------|-------------|-------|---------------------------|------------------------------------------|-----------------------------------------|-----------------------------------------|
| <b>1981</b>  | KBS         | 2.6   | -2.58 (-2.86)             | +0.25 (+1.04)                            | -43.72 (-2.14)                          | 5.9                                     |
| <b>1987</b>  | KBS         | 2.3   | -1.23 (-1.36)             | -0.40 (-1.67)                            | -3.12 (-0.15)                           | 5.9                                     |
| <b>1986</b>  | ARM         | 2.6   | +0.41 (+0.56)             | -0.08 (-0.58)                            | -7.07 (-1.24)                           | 19.9                                    |
| <b>1988</b>  | NOM         | 2.2   | -2.26 (-2.05)             | -0.65 (-1.52)                            | +1.83 (+0.15)                           | 5.8                                     |
| <b>1989</b>  | KBM         | 2.1   | +1.76 (+1.16)             | +0.25 (+1.93)                            | +19.83 (+1.62)                          | 16.8                                    |
|              | KBS         | 2.1   | +1.56 (+1.73)             | -0.04 (-0.15)                            | +43.98 (+2.16)                          |                                         |
| <b>1990*</b> | KBI         | 2.4   | +2.38 (+1.61)             | +0.21 (+1.70)                            | +4.73 (+1.38)                           | 31.8                                    |
|              | KBS         | 2.0   | +0.53 (+0.59)             | +0.36 (+1.51)                            | -11.80 (-0.58)                          |                                         |
|              | ARM         | 2.5   | +0.71 (+0.96)             | +0.14 (+1.05)                            | +8.78 (+1.54)                           |                                         |
| <b>1992</b>  | ARI         | 2.1   | -0.11 (-0.13)             | +0.02 (+0.23)                            | -3.15 (-1.65)                           | 100.8                                   |
|              | ARM         | 2.1   | -1.18 (-1.60)             | -0.20 (-1.50)                            | -10.55 (-1.85)                          |                                         |
| <b>1993</b>  | ARI         | 2.0   | -0.84 (-0.95)             | -0.12 (-1.90)                            | +0.52 (+0.27)                           | 80.9                                    |
| <b>1994</b>  | NOI         | 2.1   | -1.04 (-0.75)             | -0.04 (-0.10)                            | -0.96 (-0.30)                           | 1.3                                     |
| <b>1995</b>  | KBI         | 2.5   | +3.10 (+2.10)             | +0.23 (+1.88)                            | +6.60 (+1.93)                           | 97.8                                    |
|              | KBM         | 2.6   | +2.77 (+1.83)             | +0.29 (+2.18)                            | +9.06 (+0.74)                           |                                         |
|              | ARI         | 2.2   | +0.87 (+0.98)             | +0.06 (+0.84)                            | +2.84 (+1.48)                           |                                         |
| <b>1996*</b> | NOS         | 2.9   | +0.23 (+0.55)             | -0.63 (-2.90)                            | +21.12 (+1.67)                          | 50.8                                    |
|              | ARM         | 2.2   | +1.60 (+2.16)             | +0.23 (+1.71)                            | +3.22 (+0.56)                           |                                         |
|              | ARS         | 2.5   | +2.21 (+2.17)             | +0.53 (+1.60)                            | +32.84 (+1.81)                          |                                         |
| <b>1997</b>  | NOS         | 2.1   | -0.37 (-0.89)             | +0.39 (+1.81)                            | -8.05 (-0.64)                           | 28.3                                    |
| <b>2000</b>  | KBS         | 2.0   | +0.54 (+0.60)             | +0.39 (+1.65)                            | -15.98 (-0.78)                          | 11.7                                    |
|              | NOM         | 2.3   | -0.78 (-0.71)             | +0.37 (+0.87)                            | -28.27 (-2.24)                          |                                         |
| <b>2001</b>  | NOI         | 2.2   | -3.59 (-2.61)             | -0.61 (-1.42)                            | +0.38 (+0.12)                           | 9.7                                     |
|              | NOM         | 2.9   | -3.18 (-2.88)             | -0.89 (-2.08)                            | -0.40 (-0.03)                           |                                         |
|              | ARS         | 2.1   | +0.20 (+0.19)             | -0.71 (-2.14)                            | +15.84 (+0.87)                          |                                         |
| <b>2004</b>  | KBS         | 2.7   | +0.73 (+0.81)             | -0.63 (-2.64)                            | +40.66 (+1.99)                          | 43.9                                    |
|              | NOI         | 2.2   | +2.72 (+1.97)             | +0.77 (+1.80)                            | +4.03 (+1.25)                           |                                         |
|              | NOM         | 2.6   | +2.51 (+2.28)             | +0.84 (+1.96)                            | +27.70 (+2.20)                          |                                         |
|              | NOS         | 2.8   | +1.16 (+2.78)             | -0.07 (-0.31)                            | +34.71 (+2.74)                          |                                         |
|              | ARS         | 2.2   | +0.03 (+0.03)             | +0.33 (+1.00)                            | -32.31 (-1.78)                          |                                         |
| <b>2008</b>  | KBM         | 2.2   | -0.90 (-0.59)             | -0.15 (-1.16)                            | -25.10 (-2.05)                          | 10.9                                    |
| <b>2009</b>  | ARI         | 2.3   | -0.98 (-1.10)             | -0.02 (-0.26)                            | -5.59 (-2.92)                           | 80.9                                    |
| <b>2010</b>  | ARS         | 2.1   | +1.69 (+1.67)             | +0.57 (+1.72)                            | +19.81 (+1.10)                          | 2.6                                     |
| <b>2011</b>  | KBI         | 2.1   | +2.34 (+1.58)             | +0.12 (+0.94)                            | +6.96 (+2.03)                           | 25.9                                    |
|              | ARM         | 2.6   | +0.02 (+0.03)             | -0.06 (-0.41)                            | -7.21 (-1.26)                           |                                         |
| <b>2013</b>  | KBI         | 2.0   | -2.03 (-1.38)             | -0.19 (-1.56)                            | -6.07 (-1.78)                           | 34.3                                    |
|              | NOS         | 2.1   | -0.81 (-1.93)             | -0.11 (-0.50)                            | -22.09 (-1.74)                          |                                         |
| <b>2015</b>  | KBI         | 2.3   | +1.08 (+0.73)             | +0.06 (+0.53)                            | +5.02 (+1.47)                           | 16.9                                    |
|              | KBM         | 2.0   | +1.91 (+1.26)             | +0.13 (+1.02)                            | +20.87 (+1.70)                          |                                         |
| <b>2016</b>  | NOS         | 2.0   | +0.43 (+1.02)             | -0.36 (-1.67)                            | +22.17 (+1.75)                          | 28.3                                    |
| <b>2018</b>  | KBI         | 2.9   | -4.04 (-2.74)             | -0.27 (-2.19)                            | -8.18 (-2.39)                           | 16.9                                    |
|              | KBM         | 2.1   | -2.79 (-1.84)             | -0.08 (-0.61)                            | -28.04 (-2.29)                          |                                         |

**Table S3.** Same as Table S1, but for MAM.

| Season       | Sub-<br>regions | $d_M$ | $\overline{T_{2m}^*}$ [K] | $\overline{P^*}$ [mm day <sup>-1</sup> ] | $\overline{E_S^*}$ [W m <sup>-2</sup> ] | Area<br>[10 <sup>5</sup> km <sup>2</sup> ] |
|--------------|-----------------|-------|---------------------------|------------------------------------------|-----------------------------------------|--------------------------------------------|
| <b>1981</b>  | ARI             | 2.6   | +1.35 (+1.13)             | -0.06 (-0.60)                            | +3.32 (+1.92)                           | 32.3                                       |
| <b>1984</b>  | KBS             | 2.1   | +0.55 (+0.67)             | -0.72 (-2.21)                            | -6.59 (-0.36)                           | 75.8                                       |
|              | NOS             | 2.1   | +0.70 (+1.61)             | -0.43 (-1.38)                            | +22.96 (+1.76)                          |                                            |
|              | ARI             | 2.1   | +2.72 (+2.28)             | +0.14 (+1.40)                            | -1.23 (-0.72)                           |                                            |
| <b>1987</b>  | ARI             | 2.7   | -2.44 (-2.04)             | -0.06 (-0.55)                            | -3.87 (-2.24)                           | 32.3                                       |
| <b>1988</b>  | KBS             | 2.5   | -1.93 (-2.33)             | +0.58 (+1.77)                            | -31.94 (-1.75)                          | 16.4                                       |
|              | NOM             | 2.3   | -2.09 (-1.49)             | -0.73 (-1.53)                            | +11.70 (+1.08)                          |                                            |
|              | ARS             | 2.1   | +0.19 (+0.32)             | -0.39 (-1.90)                            | +5.93 (+0.82)                           |                                            |
| <b>1990</b>  | ARM             | 2.1   | +0.20 (+0.21)             | -0.01 (-0.08)                            | -9.51 (-2.17)                           | 52.7                                       |
| <b>1991</b>  | ARS             | 2.1   | +0.84 (+1.39)             | -0.26 (-1.29)                            | +4.97 (+0.69)                           | 18.5                                       |
| <b>1992</b>  | NOM             | 2.1   | +1.81 (+1.29)             | +0.68 (+1.43)                            | +17.83 (+1.64)                          | 4.2                                        |
| <b>1993</b>  | ARS             | 2.8   | -0.60 (-0.99)             | +0.54 (+2.64)                            | -5.98 (-0.83)                           | 18.5                                       |
| <b>1994</b>  | NOM             | 2.1   | -2.78 (-1.99)             | -0.65 (-1.38)                            | +4.90 (+0.45)                           | 36.4                                       |
|              | ARI             | 2.2   | -1.34 (-1.12)             | +0.05 (+0.53)                            | -1.17 (-0.68)                           |                                            |
| <b>1996</b>  | NOM             | 2.3   | +0.93 (+0.66)             | +0.30 (+0.63)                            | -23.07 (-2.12)                          | 4.2                                        |
| <b>1998</b>  | KBM             | 2.5   | -3.44 (-2.12)             | -0.40 (-1.96)                            | +11.80 (+1.30)                          | 10.7                                       |
| <b>1999</b>  | KBM             | 2.2   | -0.07 (-0.04)             | +0.35 (+1.70)                            | +14.86 (+1.64)                          | 42.0                                       |
|              | NOS             | 2.2   | +0.31 (+0.72)             | +0.63 (+2.03)                            | +4.71 (+0.36)                           |                                            |
| <b>2000</b>  | KBS             | 2.2   | +1.48 (+1.80)             | -0.58 (-1.77)                            | +28.90 (+1.59)                          | 12.2                                       |
| <b>2002</b>  | NOS             | 2.3   | +0.40 (+0.93)             | -0.69 (-2.24)                            | +12.12 (+0.93)                          | 31.3                                       |
| <b>2005</b>  | KBS             | 2.2   | +0.85 (+1.03)             | +0.62 (+1.89)                            | +10.33 (+0.57)                          | 12.2                                       |
| <b>2006</b>  | ARS             | 2.1   | +0.61 (+1.02)             | -0.10 (-0.50)                            | +15.04 (+2.09)                          | 18.5                                       |
| <b>2007*</b> | NOS             | 2.3   | -0.47 (-1.08)             | +0.73 (+2.36)                            | -4.74 (-0.36)                           | 31.3                                       |
| <b>2009</b>  | ARS             | 2.6   | -0.83 (-1.36)             | -0.42 (-2.04)                            | -13.21 (-1.83)                          | 18.5                                       |
| <b>2010</b>  | ARS             | 2.3   | +1.48 (+2.44)             | +0.18 (+0.90)                            | +12.73 (+1.77)                          | 18.5                                       |
| <b>2011</b>  | NOS             | 2.4   | +0.65 (+1.49)             | +0.43 (+1.39)                            | +20.50 (+1.57)                          | 31.3                                       |
| <b>2016</b>  | NOM             | 2.9   | +3.43 (+2.45)             | +0.82 (+1.73)                            | +24.57 (+2.26)                          | 120.5                                      |
|              | NOS             | 2.4   | +0.98 (+2.27)             | -0.02 (-0.08)                            | +28.64 (+2.20)                          |                                            |
|              | ARI             | 2.7   | +2.94 (+2.46)             | +0.24 (+2.34)                            | +0.12 (+0.07)                           |                                            |
|              | ARM             | 2.5   | +1.90 (+2.01)             | +0.06 (+0.75)                            | +7.65 (+1.75)                           |                                            |
| <b>2018*</b> | KBS             | 2.8   | +0.45 (+0.55)             | +0.89 (+2.73)                            | -1.76 (-0.10)                           | 12.2                                       |

**Table S4.** Same as Table S1, but for SON.

## Sea ice transport during DJF 2016/17

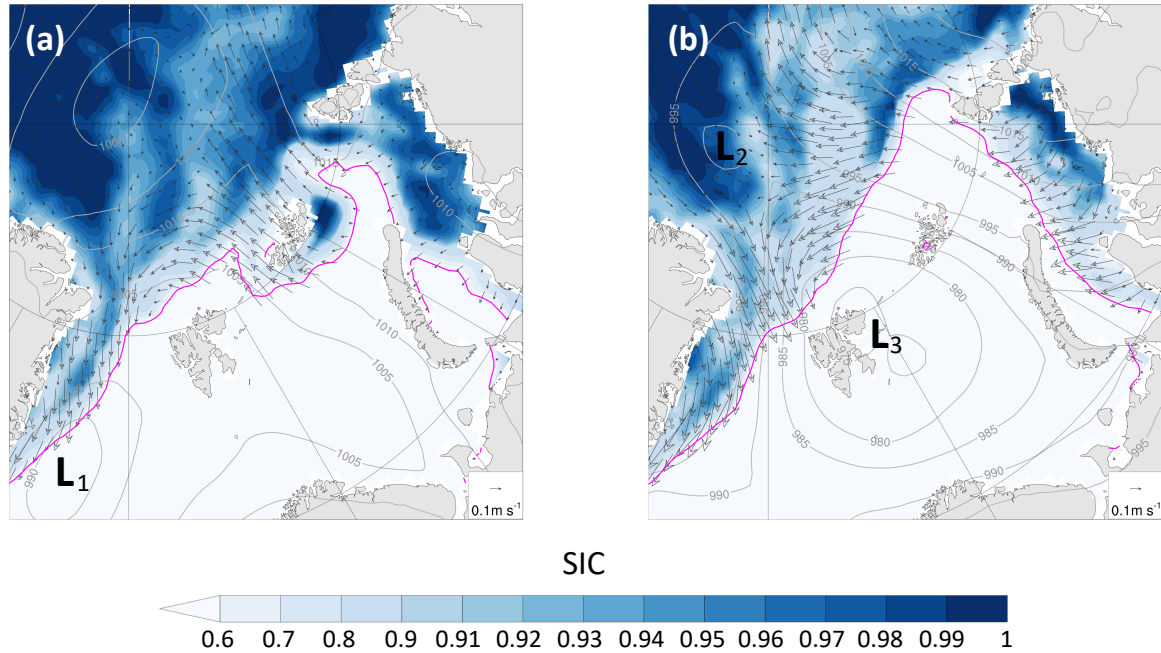

**Figure S4.** Daily mean SIC (color, note the irregular contour intervals) and sea ice transport vectors from PIOMAS (in  $\text{m s}^{-1}$ ) as well as instantaneous sea ice edge (SIC = 0.5, pink line) and SLP (grey contour, in intervals of 5 hPa) at 00 UTC on (a) 17 December 2016 and (b) 24 December 2016 in the region of the Kara-Barents Seas. Labels mark the positions of surface cyclones ( $L_1$ - $L_3$ ).

Figure S4 shows the influence of several surface cyclones on the sea ice transport in the Kara-Barents Seas during the extreme winter 2016/17, leading to a strong reduction of SIC between 18 December and 23 December 2016 (see Fig. 10c in the main paper). Figure S4a shows the situation before this event on 17 December, when a first cyclone ( $L_1$ ) approaches the region from the Nordic Seas and the sea ice edge still extends to the South of Franz Josef Land. During the following days, the wind field and warm air advection associated with the cyclones  $L_1$  and  $L_2$ , travelling from the Nordic Seas into the High Arctic, and  $L_3$ , which becomes stationary in the Barents Seas (see supplementary animation S2 and blue heatmap in Fig. 10 in the main paper), result in a strong retreat of the sea ice edge in the northern part of the Barents Sea. The remains of cyclone  $L_2$  as well as cyclone  $L_3$  on 24 December are shown in Fig. S4b along with the reduction in SIC, which leads to a higher mobility of the sea ice in the High Arctic and thus stronger sea ice transport in this region.
