# Supplementary figures and images for: Identification, characteristics, and dynamics of Arctic extreme seasons
Source: Copernicus journal article supplement (doi:10.5194/wcd-2021-18), 2021-04-13

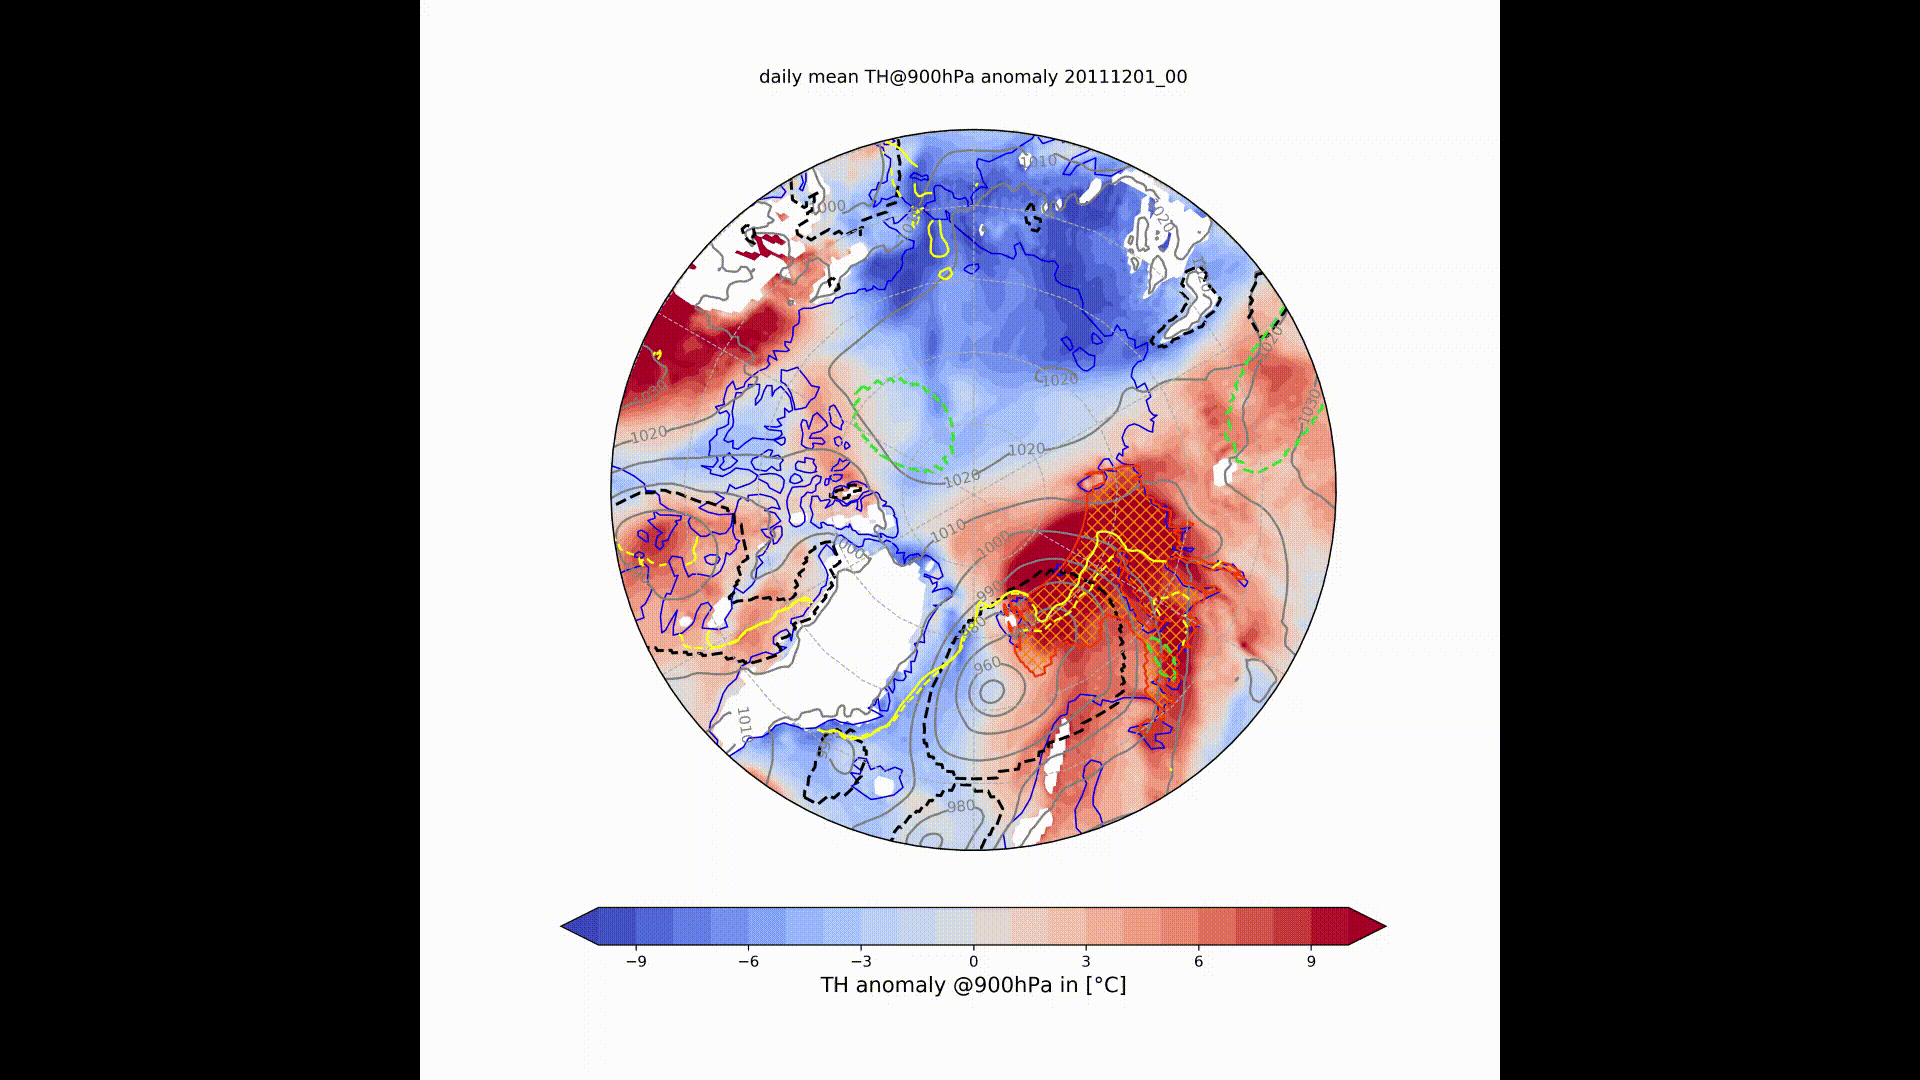

Supplement: Supplementary file 1 [file wcd-2021-18-supplement.zip › supplementary_animation_S1_DJF_1112.gif]

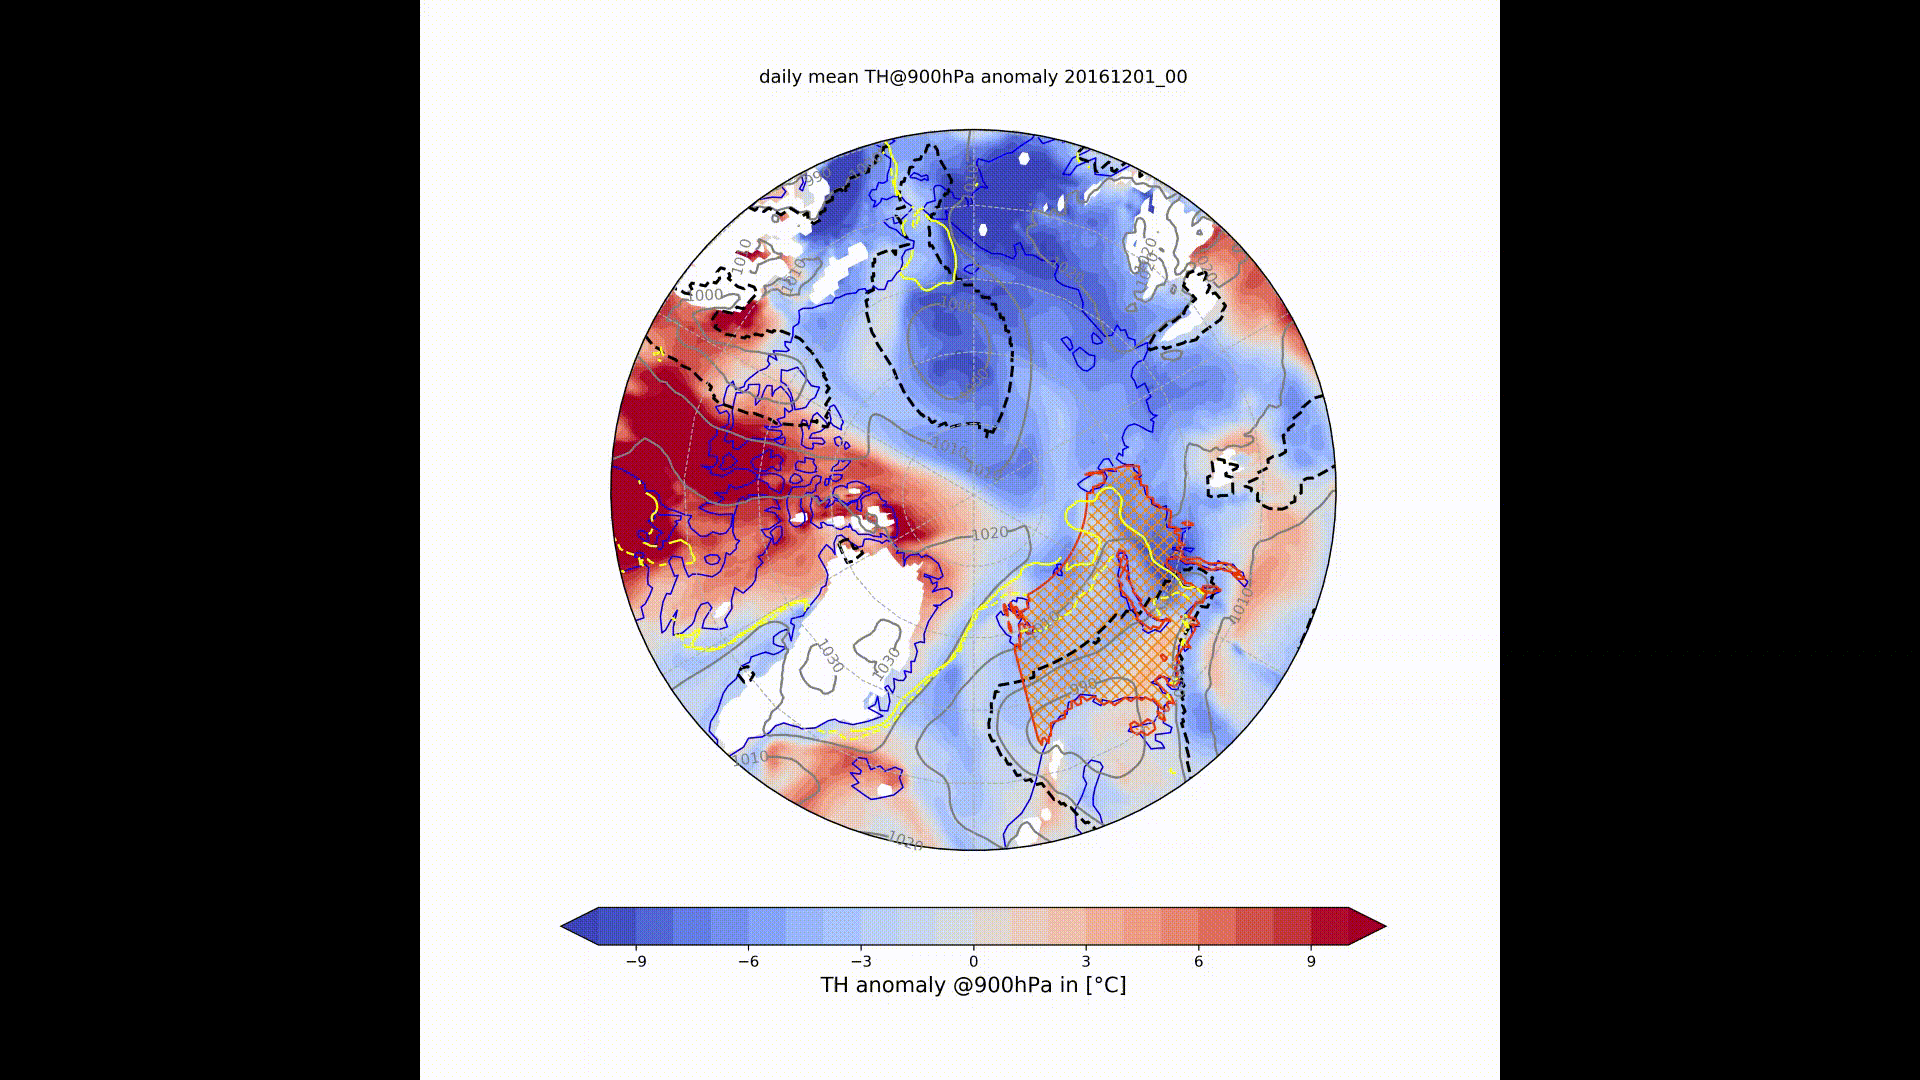

Supplement: Supplementary file 1 [file wcd-2021-18-supplement.zip › supplementary_animation_S2_DJF_1617.gif]

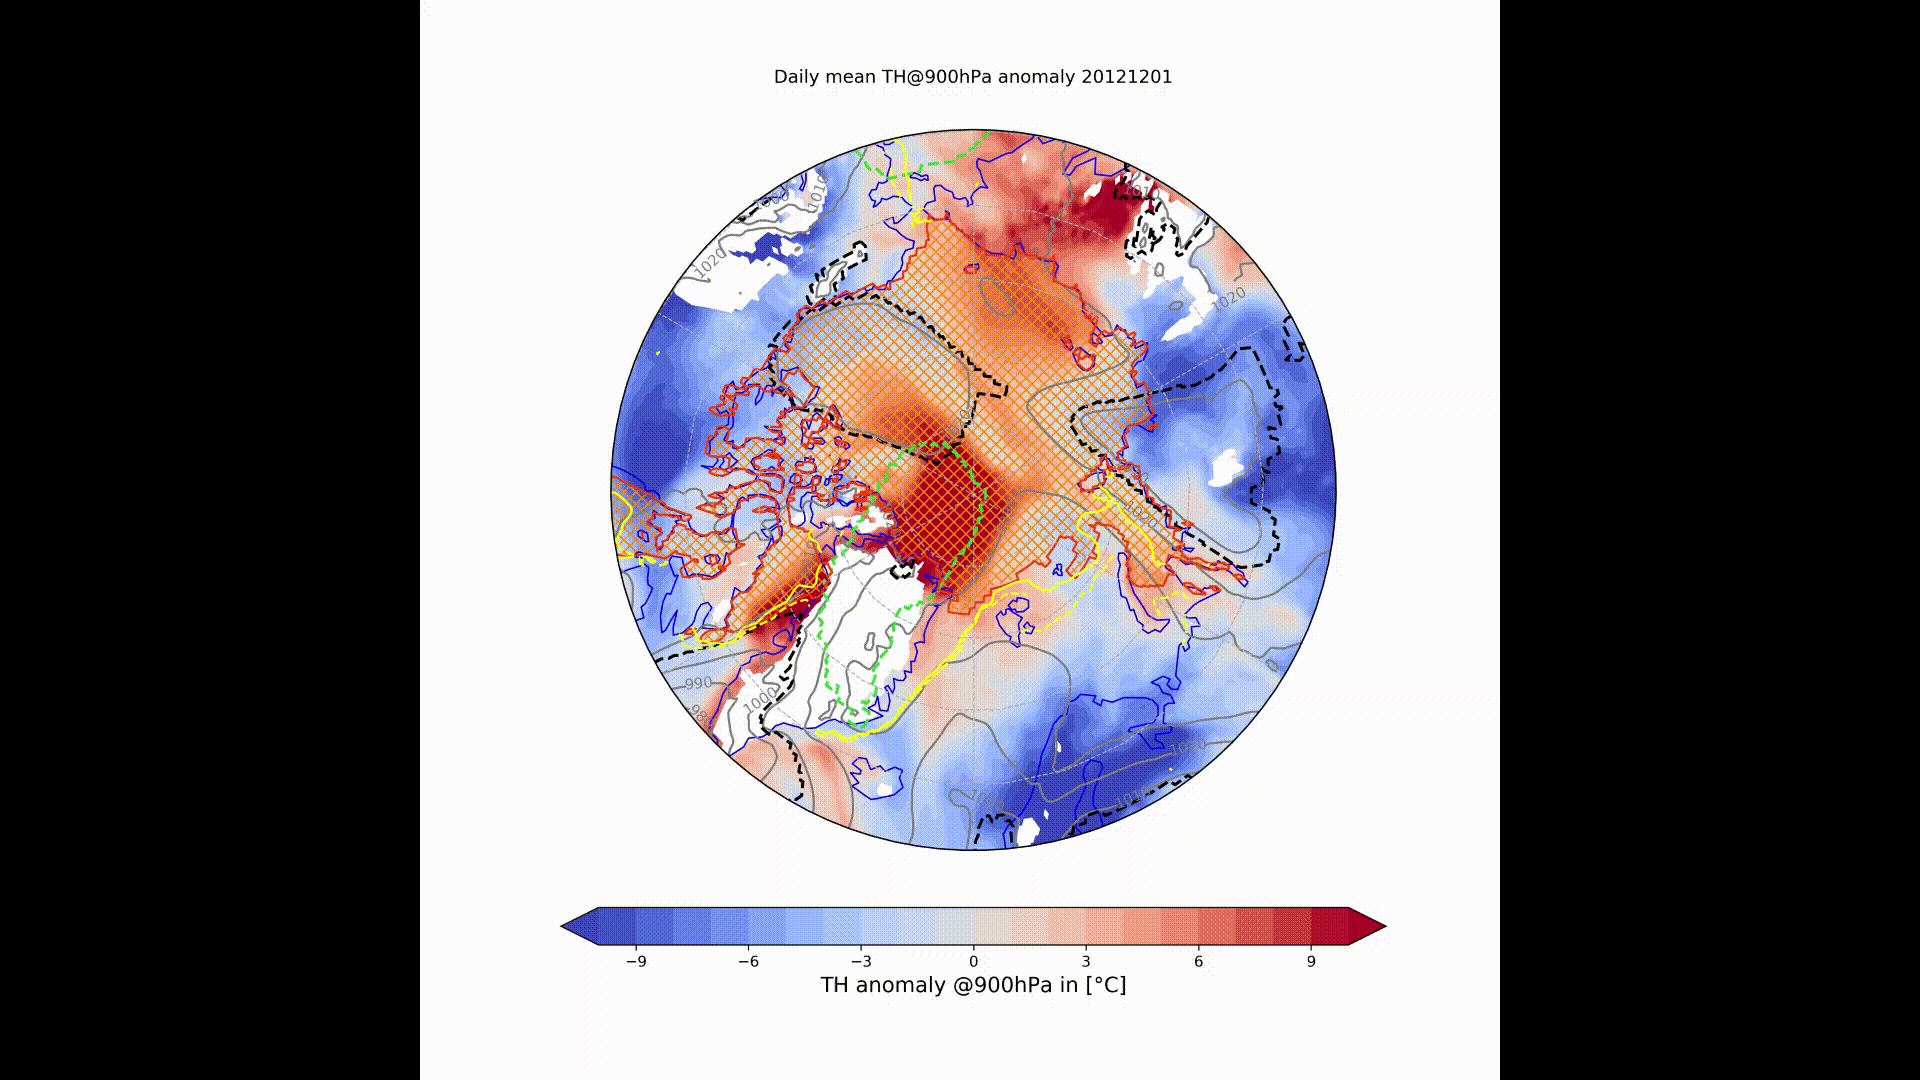

Supplement: Supplementary file 1 [file wcd-2021-18-supplement.zip › supplementary_animation_S3_DJF_1213.gif]
